# Supplementary material for: Origin and Evolution of Eocene Rock Salts in Pakistan and Implications for Paleoclimate Studies: Insights From Chemistry and Cl Stable Isotopes
Source: Frontiers journal article supplement (doi:10.3389/feart.2021.644485), 2021-04-08
Supplement: Table_1.DOCX [file Table_1.DOCX]

**Table**

| Reion | Sample | Cl-  ppm | Br-  ppm | B3+  ppm | Ca2+  ppm | K+  ppm | Li+  ppm | Mg2+  ppm | Na+  ppm | SO42-  ppm | 37Cl  ‰ | Error  ‰ |
| --- | --- | --- | --- | --- | --- | --- | --- | --- | --- | --- | --- | --- |
| Jatta | A-1 | 591110.4 | 2.25 | <0.0072 | 2749.78 | 104.12 | 3.71 | 20.05 | 383061.7 | 5919.19 | -0.15 | 0.05 |
| A-2 | 592647.9 | 2.21 | <0.0072 | 2179.82 | 113.21 | 3.88 | 20.41 | 384097.2 | 4646.17 | -0.03 | 0.04 |
| A-3 | 550320.7 | 2.11 | <0.0072 | 9214.54 | 113.04 | 4.41 | 18.16 | 356155.2 | 20479.94 | -0.54 | 0.06 |
| B-1 | 599593.2 | 2.33 | <0.0072 | 88.44 | 118.33 | 3.47 | 23.94 | 390451 | 225.4 | 0.69 | 0.13 |
| B-2 | 558776.3 | 2.05 | <0.0072 | 8458.22 | 185.09 | 2.64 | 35.57 | 361712.8 | 18976.26 | 0.29 | 0.12 |
| B-3 | 558080.4 | 2.17 | <0.0072 | 8326.75 | 155.82 | 4.2 | 63.12 | 361253.6 | 18717.9 | 0.39 | 0.15 |
| C-1 | 545489.1 | 2.26 | <0.0072 | 9763.02 | 155.16 | 3.48 | 29.96 | 352658.3 | 21135.75 | -0.32 | 0.03 |
| C-2 | 565499.6 | 2.05 | <0.0072 | 6600.86 | 126.44 | 3.34 | 9.38 | 367752.6 | 17853.88 | -0.16 | 0.08 |
| C-3 | 582439.4 | 1.3 | <0.0072 | 4817.71 | 111.16 | 3.76 | 126.54 | 377306 | 11029.13 | -0.24 | 0.05 |
| Karrak | D-1 | 473510.6 | 2.22 | <0.0072 | 9796.43 | 179.15 | 2.72 | 57.1 | 305864.4 | 21147.7 | -0.06 | 0.05 |
| D-2 | 526668.4 | 2.14 | <0.0072 | 10396.13 | 507.73 | 2.96 | 125.26 | 341049.3 | 24716.07 | -0.25 | 0.12 |
| D-3 | 540145 | 2.37 | <0.0072 | 11473.05 | 145.15 | 4.13 | 29.83 | 349166.7 | 25167.27 | -0.18 | 0.26 |
| D-4 | 496278.5 | 2.04 | <0.0072 | 13025.51 | 168.52 | 2.52 | 33.22 | 321023.1 | 29584.64 | -0.46 | 0.05 |
| E-1 | 558421.5 | 2.12 | <0.0072 | 9066.92 | 139.22 | 3.49 | 11 | 361596.7 | 20518.82 | 0.83 | 0.17 |
| E-2 | 561922.5 | 2.23 | <0.0072 | 6777.26 | 123.19 | 3.05 | 13.46 | 363923.9 | 15141.28 | -0.07 | 0.24 |
| E-3 | 550577.1 | 1.76 | <0.0072 | 11036.04 | 130.97 | 4.01 | 13.92 | 355285.6 | 22686.3 | -0.06 | 0.05 |
| Bahadur Khel | M4-1 | 577665.2 | 1.94 | 13.65 | 7750.18 | 82.51 | 0.77 | 32.51 | 373962.7 | 17133.25 | -0.26 | 0.17 |
| M4-2 | 564373.8 | 1.85 | 4.77 | 8808.81 | 83.13 | 0.1 | 37.04 | 365623 | 20278.07 | -0.2 | 0.05 |
| M4-3 | 576612.1 | 1.71 | 2.57 | 6585 | 105.7 | 1.31 | 24.5 | 373436.7 | 14667.23 | -0.1 | 0.23 |
| M17-1 | 575358.7 | 2.1 | <0.0072 | 7848.77 | 100.85 | 1.09 | 30.88 | 372284 | 17004.87 | 0.28 | 0.01 |
| M17-2 | 571203.3 | 1.78 | <0.0072 | 9413.37 | 71.43 | 1.17 | 27.82 | 369778.9 | 21102.12 | -0.14 | 0.31 |
| M17-3 | 532018.8 | 1.92 | 1.29 | 8654.4 | 174.19 | 0.14 | 42.14 | 344216.4 | 19171.54 | -0.11 | 0.21 |
| M17-4 | 555311.8 | 1.94 | <0.0072 | 10310.72 | 121.99 | 1.16 | 47 | 359532.2 | 23520.57 | -0.26 | 0.17 |
| OA | 561138.9 | 2.01 | <0.0072 | 7248.57 | 123.74 | 1.01 | 15.86 | 363103.7 | 15629.58 | -0.35 | 0.01 |
